# Supplementary material
Source: PubMed Central journal article supplement (PMC7785676)

# Supplementary Figure 8

## A

| Methylation Classifier | MethylSeq Assay |    |    |
|------------------------|-----------------|----|----|
|                        | LM              | IM | HM |
| LM                     | 16              | 0  | 0  |
| IM                     | 3               | 7  | 0  |
| HM                     | 0               | 1  | 20 |

Concordance: 91.49 %

## B

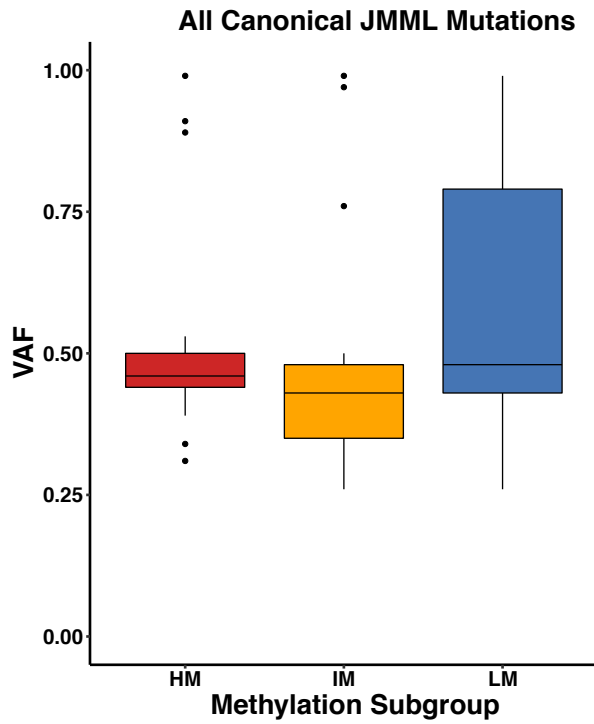

## C

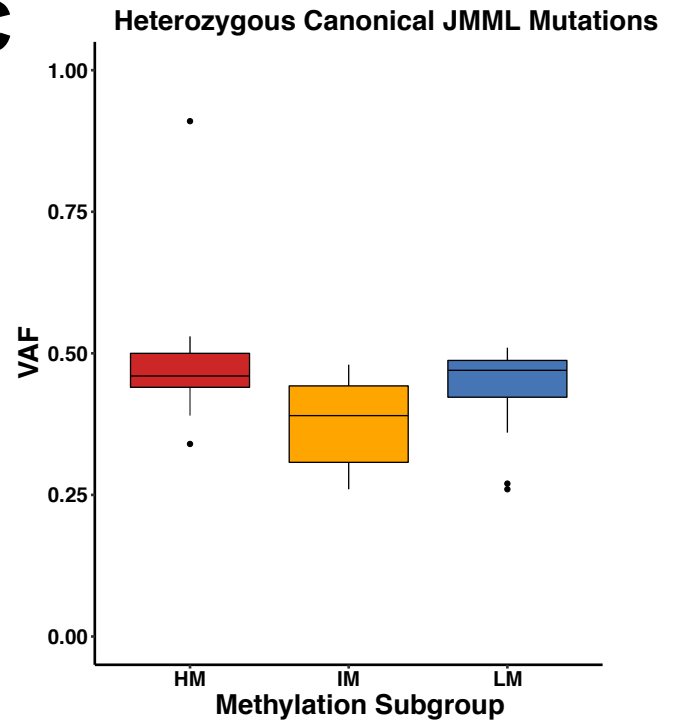

Supplement: NIHMS1642067-supplement-12.pdf [file NIHMS1642067-supplement-12.pdf]
