# Supplementary material
Source: PubMed Central journal article supplement (PMC7785676)
Supplement: NIHMS1642067-supplement-13.pdf [file NIHMS1642067-supplement-13.pdf]

# Supplementary Table 1

|                                      | TOTAL             | JMML              | NS/MPD              | p       |
|--------------------------------------|-------------------|-------------------|---------------------|---------|
| <b>PATIENTS</b>                      |                   |                   |                     |         |
| Patients                             | 284               | 255               | 29                  |         |
| <b>SOURCE</b>                        |                   |                   |                     |         |
| Bone marrow                          | 194 (68.3%)       | 175 (68.6%)       | 19 (65.5%)          | 0.8962  |
| Peripheral blood                     | 90 (31.7%)        | 80 (31.4%)        | 10 (34.5%)          |         |
| <b>STUDY GROUP</b>                   |                   |                   |                     |         |
| EWOG-MDS                             | 143 (50.4%)       | 125 (49.0%)       | 18 (62.1%)          | 0.2560  |
| Japan                                | 104 (36.6%)       | 93 (36.5%)        | 11 (37.9%)          | 0.9999  |
| USA                                  | 37 (13.0%)        | 37 (14.5%)        | 0 (0.0%)            | NA      |
| <b>AGE</b>                           |                   |                   |                     |         |
| Median (Range) [years]               | 1.3 (0.0, 13.4)   | 1.4 (0.1, 13.4)   | 0.1 (0.0, 0.3)      | <0.0001 |
| ≥ 1 year                             | 172 (60.6%)       | 172 (67.5%)       | 0 (0.0%)            | <0.0001 |
| ≥ 2 years                            | 101 (35.6%)       | 101 (39.6%)       | 0 (0.0%)            | <0.0001 |
| <b>SEX</b>                           |                   |                   |                     |         |
| Male                                 | 195 (68.7%)       | 175 (68.6%)       | 20 (69.0%)          | 0.9999  |
| Female                               | 89 (31.3%)        | 80 (31.4%)        | 9 (31.0%)           |         |
| <b>KARYOTYPE</b>                     |                   |                   |                     |         |
| Monosomy 7                           | 36 (12.7%)        | 36 (14.1%)        | 0 (0.0%)            | NA      |
| <b>HbF</b>                           |                   |                   |                     |         |
| Elevated                             | 149 (65.6%)       | 145 (69.0%)       | 4 (23.5%)           | 0.0004  |
| n                                    | 227               | 210               | 17                  |         |
| <b>LEUKOCYTES</b>                    |                   |                   |                     |         |
| Median (Range) [x10 <sup>9</sup> /L] | 30.1 (2.9, 563.0) | 29.9 (2.9, 563.0) | 31.6 (10.1, 84.0)   | 0.4015  |
| ≥ 25 x 10 <sup>9</sup> /L            | 169 (59.9%)       | 149 (58.9%)       | 20 (69.0%)          | 0.3962  |
| n                                    | 282               | 253               | 29                  |         |
| <b>PLATELETS</b>                     |                   |                   |                     |         |
| Median (Range) [x10 <sup>9</sup> /L] | 72.0 (5.0, 730.0) | 65.5 (5.0, 730.0) | 182.0 (48.0, 548.0) | <0.0001 |
| < 33 x 10 <sup>9</sup> /L            | 62 (23.1%)        | 62 (25.4%)        | 0 (0.0%)            | 0.0104  |
| < 50 x 10 <sup>9</sup> /L            | 99 (36.9%)        | 98 (40.2%)        | 1 (4.2%)            | 0.0011  |
| n                                    | 268               | 244               | 24                  |         |
