# Supplementary material
Source: PubMed Central journal article supplement (PMC7785676)
Supplement: NIHMS1642067-supplement-14.pdf [file NIHMS1642067-supplement-14.pdf]

# Supplementary Table 2

| JMML STUDY GROUPS                    | TOTAL             | EWOG-MDS          | JAPAN             | USA                | p                 |
|--------------------------------------|-------------------|-------------------|-------------------|--------------------|-------------------|
| <b>PATIENTS</b>                      |                   |                   |                   |                    |                   |
| Patients                             | 255               | 125               | 93                | 37                 |                   |
| <b>SOURCE</b>                        |                   |                   |                   |                    |                   |
| Bone marrow                          | 175 (68.6%)       | 93 (74.4%)        | 76 (81.7%)        | 6 (16.2%)          | <b>&lt;0.0001</b> |
| Peripheral blood                     | 80 (31.4%)        | 32 (25.6%)        | 17 (18.3%)        | 31 (83.8%)         |                   |
| <b>AGE</b>                           |                   |                   |                   |                    |                   |
| Median (Range) [years]               | 1.4 (0.1, 13.4)   | 1.4 (0.1, 12.3)   | 1.4 (0.1, 13.4)   | 1.5 (0.1, 7.3)     | 0.9046            |
| ≥ 1 year                             | 172 (67.5%)       | 85 (68.0%)        | 63 (67.6%)        | 24 (64.9%)         | 0.9354            |
| ≥ 2 years                            | 101 (39.6%)       | 51 (40.8%)        | 35 (37.6%)        | 15 (40.5%)         | 0.8873            |
| <b>SEX</b>                           |                   |                   |                   |                    |                   |
| MALE                                 | 175 (68.6%)       | 87 (69.6%)        | 62 (66.7%)        | 26 (70.3%)         | 0.8749            |
| FEMALE                               | 80 (31.4%)        | 38 (30.4%)        | 31 (33.3%)        | 11 (29.7%)         |                   |
| <b>MUTATION GROUP</b>                |                   |                   |                   |                    |                   |
| PTPN11                               | 97 (38.0%)        | 51 (40.8%)        | 33 (35.5%)        | 13 (35.1%)         | 0.6722            |
| NF1                                  | 24 (9.4%)         | 13 (10.4%)        | 6 (6.5%)          | 5 (13.5%)          | 0.4007            |
| NRAS                                 | 40 (15.7%)        | 19 (15.2%)        | 13 (14.0%)        | 8 (21.6%)          | 0.5453            |
| KRAS                                 | 36 (14.1%)        | 19 (15.2%)        | 14 (15.1%)        | 3 (8.1%)           | 0.5246            |
| CBL                                  | 36 (14.1%)        | 13 (10.4%)        | 17 (18.3%)        | 6 (16.2%)          | 0.2360            |
| Quint.-neg.                          | 21 (8.2%)         | 9 (7.2%)          | 10 (10.8%)        | 2 (5.4%)           | 0.5093            |
| <b>KARYOTYPE</b>                     |                   |                   |                   |                    |                   |
| Monosomy 7                           | 36 (14.1%)        | 27 (21.6%)        | 8 (8.6%)          | 1 (2.7%)           | <b>0.0024</b>     |
| <b>HbF</b>                           |                   |                   |                   |                    |                   |
| Elevated                             | 145 (69.0%)       | 61 (64.9%)        | 58 (72.5%)        | 26 (72.2%)         | 0.5029            |
| Normal                               | 65 (31.0%)        | 33 (35.1%)        | 22 (27.5%)        | 10 (27.8%)         |                   |
| n                                    | 210               | 94                | 80                | 36                 |                   |
| <b>LEUKOCYTES</b>                    |                   |                   |                   |                    |                   |
| Median (Range) [x10 <sup>9</sup> /L] | 29.9 (2.9, 563.0) | 31.8 (3.5, 217.4) | 27.4 (2.9, 563.0) | 27.1 (9.0, 108.9)  | 0.8034            |
| ≥ 25 x 10 <sup>9</sup> /L            | 149 (58.9%)       | 77 (62.1%)        | 51 (54.8%)        | 21 (58.3%)         | 0.5594            |
| n                                    | 253               | 124               | 93                | 36                 |                   |
| <b>PLATELETS</b>                     |                   |                   |                   |                    |                   |
| Median (Range) [x10 <sup>9</sup> /L] | 65.5 (5.0, 730.0) | 67.0 (5.0, 442.0) | 65.0 (6.0, 730.0) | 59.0 (10.0, 189.0) | 0.4928            |
| < 33 x 10 <sup>9</sup> /L            | 62 (25.4%)        | 31 (26.7%)        | 22 (23.7%)        | 9 (25.7%)          | 0.8788            |
| < 50 x 10 <sup>9</sup> /L            | 98 (40.2%)        | 47 (40.5%)        | 36 (38.7%)        | 15 (42.9%)         | 0.9078            |
| n                                    | 244               | 116               | 93                | 35                 |                   |
| <b>Cluster</b>                       |                   |                   |                   |                    |                   |
| Total LM                             | 107 (42.0%)       | 43 (34.4%)        | 50 (53.8%)        | 14 (37.8%)         | 0.0142            |
| Total HM                             | 148 (58.0%)       | 82 (65.6%)        | 43 (46.2%)        | 23 (62.2%)         |                   |
