# Supplementary material
Source: PubMed Central journal article supplement (PMC7785676)
Supplement: NIHMS1642067-supplement-15.pdf [file NIHMS1642067-supplement-15.pdf]

# Supplementary Table 3

| METHYLATION GROUPS                   | TOTAL             | LM                | IM                | HM                | p       |
|--------------------------------------|-------------------|-------------------|-------------------|-------------------|---------|
| <b>PATIENTS</b>                      |                   |                   |                   |                   |         |
| Patients                             | 255               | 104               | 67                | 84                |         |
| <b>SOURCE</b>                        |                   |                   |                   |                   |         |
| Bone marrow                          | 175 (68.6%)       | 73 (70.2%)        | 45 (67.2%)        | 57 (67.9%)        | 0.9012  |
| Peripheral blood                     | 80 (31.4%)        | 31 (29.8%)        | 22 (32.8%)        | 27 (32.1%)        |         |
| <b>STUDY GROUP</b>                   |                   |                   |                   |                   |         |
| EWOG-MDS                             | 125 (49.0%)       | 41 (39.4%)        | 48 (71.6%)        | 36 (42.9%)        | <0.0001 |
| JAPAN                                | 93 (36.5%)        | 50 (48.1%)        | 9 (13.4%)         | 34 (40.5%)        | <0.0001 |
| USA                                  | 37 (14.5%)        | 13 (12.5%)        | 10 (14.9%)        | 14 (16.7%)        | 0.7178  |
| <b>AGE</b>                           |                   |                   |                   |                   |         |
| Median (Range) [years]               | 1.4 (0.1, 13.4)   | 0.7 (0.1, 8.7)    | 1.4 (0.1, 6.0)    | 3.0 (1.0, 13.4)   | <0.0001 |
| ≥ 1 year                             | 154 (60.4%)       | 41 (39.4%)        | 47 (70.1%)        | 84 (100%)         | <0.0001 |
| ≥ 2 years                            | 101 (39.6%)       | 12 (11.5%)        | 21 (31.3%)        | 68 (81.0%)        | <0.0001 |
| <b>SEX</b>                           |                   |                   |                   |                   |         |
| Male                                 | 175 (68.6%)       | 63 (60.6%)        | 48 (71.6%)        | 64 (76.2%)        | 0.0595  |
| Female                               | 80 (31.4%)        | 41 (39.4%)        | 19 (28.4%)        | 20 (23.8%)        |         |
| <b>MUTATION GROUP</b>                |                   |                   |                   |                   |         |
| PTPN11                               | 97 (38.0%)        | 10 (9.6%)         | 28 (41.8%)        | 59 (70.2%)        | <0.0001 |
| NF1                                  | 24 (9.4%)         | 4 (3.8%)          | 9 (13.4%)         | 11 (13.1%)        | 0.0411  |
| NRAS                                 | 40 (15.7%)        | 30 (28.8%)        | 3 (4.5%)          | 7 (8.3%)          | <0.0001 |
| KRAS                                 | 36 (14.1%)        | 14 (13.5%)        | 18 (26.9%)        | 4 (4.8%)          | 0.0005  |
| CBL                                  | 36 (14.1%)        | 35 (33.7%)        | 1 (1.5%)          | 0 (0.0%)          | <0.0001 |
| Quint.-neg.                          | 21 (8.2%)         | 11 (10.6%)        | 8 (11.9%)         | 2 (2.4%)          | 0.0555  |
| <b>KARYOTYPE</b>                     |                   |                   |                   |                   |         |
| Monosomy 7                           | 36 (14.1%)        | 0 (0.0%)          | 27 (40.3%)        | 9 (10.7%)         | <0.0001 |
| <b>HbF</b>                           |                   |                   |                   |                   |         |
| Elevated                             | 145 (69%)         | 37 (45.1%)        | 35 (63.6%)        | 73 (100%)         | <0.0001 |
| Normal                               | 65 (31%)          | 45 (54.9%)        | 20 (36.4%)        | 0 (0%)            |         |
| n                                    | 210               | 82                | 55                | 73                |         |
| <b>LEUKOCYTES</b>                    |                   |                   |                   |                   |         |
| Median (Range) [x10 <sup>9</sup> /L] | 29.9 (2.9, 563.0) | 30.1 (5.7, 162.0) | 30.1 (5.1, 108.9) | 27.3 (2.9, 563.0) | 0.2731  |
| ≥ 25 x 10 <sup>9</sup> /L            | 149 (58.9%)       | 64 (62.1%)        | 39 (58.2%)        | 46 (55.4%)        | 0.6461  |
| n                                    | 253               | 103               | 67                | 83                |         |
| <b>PLATELETS</b>                     |                   |                   |                   |                   |         |
| Median (Range) [x10 <sup>9</sup> /L] | 65.5 (5.0, 730.0) | 89.5 (8.0, 454.0) | 88.0 (5.0, 730.0) | 46.0 (6.0, 234.0) | <0.0001 |
| < 33 x 10 <sup>9</sup> /L            | 62 (25.4%)        | 17 (17.0%)        | 14 (21.9%)        | 31 (38.8%)        | 0.0029  |
| < 50 x 10 <sup>9</sup> /L            | 98 (40.2%)        | 29 (29.0%)        | 23 (35.9%)        | 46 (57.5%)        | 0.0004  |
| n                                    | 244               | 100               | 64                | 80                |         |
| <b>CLUSTER</b>                       |                   |                   |                   |                   |         |
| Total LM                             | 107 (42.0%)       | 100 (96.2%)       | 7 (10.4%)         | 0 (0.0%)          | <0.0001 |
| Total HM                             | 148 (58.0%)       | 4 (3.8%)          | 60 (89.6%)        | 84 (100.0%)       |         |
