# Supplementary material
Source: PubMed Central journal article supplement (PMC7785676)
Supplement: NIHMS1642067-supplement-16.pdf [file NIHMS1642067-supplement-16.pdf]

# Supplementary Table 4

| VALIDATION COHORT                    | TOTAL              | LM                 | IM                 | HM                 | p                 |
|--------------------------------------|--------------------|--------------------|--------------------|--------------------|-------------------|
| <b>PATIENTS</b>                      |                    |                    |                    |                    |                   |
| Patients                             | 47                 | 16                 | 10                 | 21                 |                   |
| <b>STUDY GROUP</b>                   |                    |                    |                    |                    |                   |
| EWOG-MDS                             | 9 (19.1%)          | 2 (12.5%)          | 1 (10.0%)          | 6 (28.6%)          | 0.3326            |
| JAPAN                                | 18 (38.3%)         | 8 (50.0%)          | 5 (50.0%)          | 5 (23.8%)          | 0.1852            |
| USA                                  | 20 (42.6%)         | 6 (37.5%)          | 4 (40.0%)          | 10 (47.6%)         | 0.8129            |
| <b>DIAGNOSIS</b>                     |                    |                    |                    |                    |                   |
| JMML                                 | 46 (97.9%)         | 15 (93.8%)         | 10 (100.0%)        | 21 (100.0%)        |                   |
| NS/MPD                               | 1 (2.1%)           | 1 (6.2%)           | 0 (0.0%)           | 0 (0.0%)           |                   |
| <b>AGE</b>                           |                    |                    |                    |                    |                   |
| Median (Range) [years]               | 1.7 (0.0, 6.4)     | 0.5 (0.0, 2.2)     | 1.0 (0.5, 2.7)     | 2.5 (1.7, 6.4)     | <b>&lt;0.0001</b> |
| ≥ 1 years                            | 32 (68.1%)         | 5 (31.2%)          | 6 (60.0%)          | 21 (100.0%)        | <b>&lt;0.0001</b> |
| ≥ 2 years                            | 20 (42.6%)         | 1 (6.2%)           | 1 (10.0%)          | 18 (85.7%)         | <b>&lt;0.0001</b> |
| <b>SEX</b>                           |                    |                    |                    |                    |                   |
| Male                                 | 33 (70.2%)         | 11 (68.8%)         | 6 (60.0%)          | 16 (76.2%)         |                   |
| Female                               | 14 (29.8%)         | 5 (31.2%)          | 4 (40.0%)          | 5 (23.8%)          | 0.6460            |
| <b>MUTATIONAL SUBGROUPS</b>          |                    |                    |                    |                    |                   |
| PTPN11                               | 20 (43.5%)         | 2 (13.3%)          | 4 (40.0%)          | 14 (66.7%)         | <b>0.0061</b>     |
| NF1                                  | 4 (8.7%)           | 0 (0.0%)           | 1 (10.0%)          | 3 (14.3%)          | 0.3204            |
| NRAS                                 | 11 (23.9%)         | 6 (40.0%)          | 2 (20.0%)          | 3 (14.3%)          | 0.1933            |
| KRAS                                 | 7 (15.2%)          | 3 (20.0%)          | 3 (30.0%)          | 1 (4.8%)           | 0.1542            |
| CBL                                  | 2 (4.3%)           | 2 (13.3%)          | 0 (0.0%)           | 0 (0.0%)           | 0.1153            |
| Quint.-neg.                          | 2 (4.3%)           | 2 (13.3%)          | 0 (0.0%)           | 0 (0.0%)           | 0.1153            |
| <b>KARYOTYPE</b>                     |                    |                    |                    |                    |                   |
| Monosomy 7                           | 4 (8.7%)           | 0 (0.0%)           | 2 (20.0%)          | 2 (9.5%)           | 0.2169            |
| <b>HbF</b>                           |                    |                    |                    |                    |                   |
| Elevated                             | 35 (77.8%)         | 8 (57.1%)          | 6 (60.0%)          | 21 (100.0%)        | <b>0.0036</b>     |
| Normal                               | 10 (22.2%)         | 6 (42.9%)          | 4 (40.0%)          | 0 (0.0%)           |                   |
| n                                    | 45                 | 14                 | 10                 | 21                 |                   |
| <b>LEUKOCYTES</b>                    |                    |                    |                    |                    |                   |
| Median (Range) [x10 <sup>9</sup> /L] | 30.2 (5.0, 166.4)  | 25.4 (5.0, 166.4)  | 45.4 (13.5, 98.0)  | 28.9 (5.7, 132.6)  | 0.9135            |
| ≥ 25 x 10 <sup>9</sup> /L            | 31 (66.0%)         | 8 (50.0%)          | 9 (90.0%)          | 14 (66.7%)         | 0.1112            |
| <b>PLATELETS</b>                     |                    |                    |                    |                    |                   |
| Median (Range) [x10 <sup>9</sup> /L] | 67.0 (11.0, 490.0) | 73.0 (26.0, 490.0) | 66.0 (38.0, 302.0) | 50.0 (11.0, 201.0) | 0.0973            |
| < 33 x 10 <sup>9</sup> /L            | 6 (12.8%)          | 2 (12.5%)          | 0 (0.0%)           | 4 (19.0%)          | 0.3315            |
| < 50 x 10 <sup>9</sup> /L            | 14 (29.8%)         | 3 (18.8%)          | 2 (20.0%)          | 9 (42.9%)          | 0.2117            |
| <b>SURVIVAL</b>                      |                    |                    |                    |                    |                   |
| Median OS [years]                    | 6.7                | NA                 | NA                 | 2.27               | <b>0.0031</b>     |
| Median Follow-up (Range) [years]     | 2.3 (0.2, 10.8)    | 2.9 (0.2, 10.8)    | 1.5 (0.8, 3.4)     | 1.5 (0.2, 6.7)     |                   |
