# Supplementary material
Source: PubMed Central journal article supplement (PMC7785676)
Supplement: NIHMS1642067-supplement-17.pdf [file NIHMS1642067-supplement-17.pdf]

# 1 Supplementary Methods Figure 1

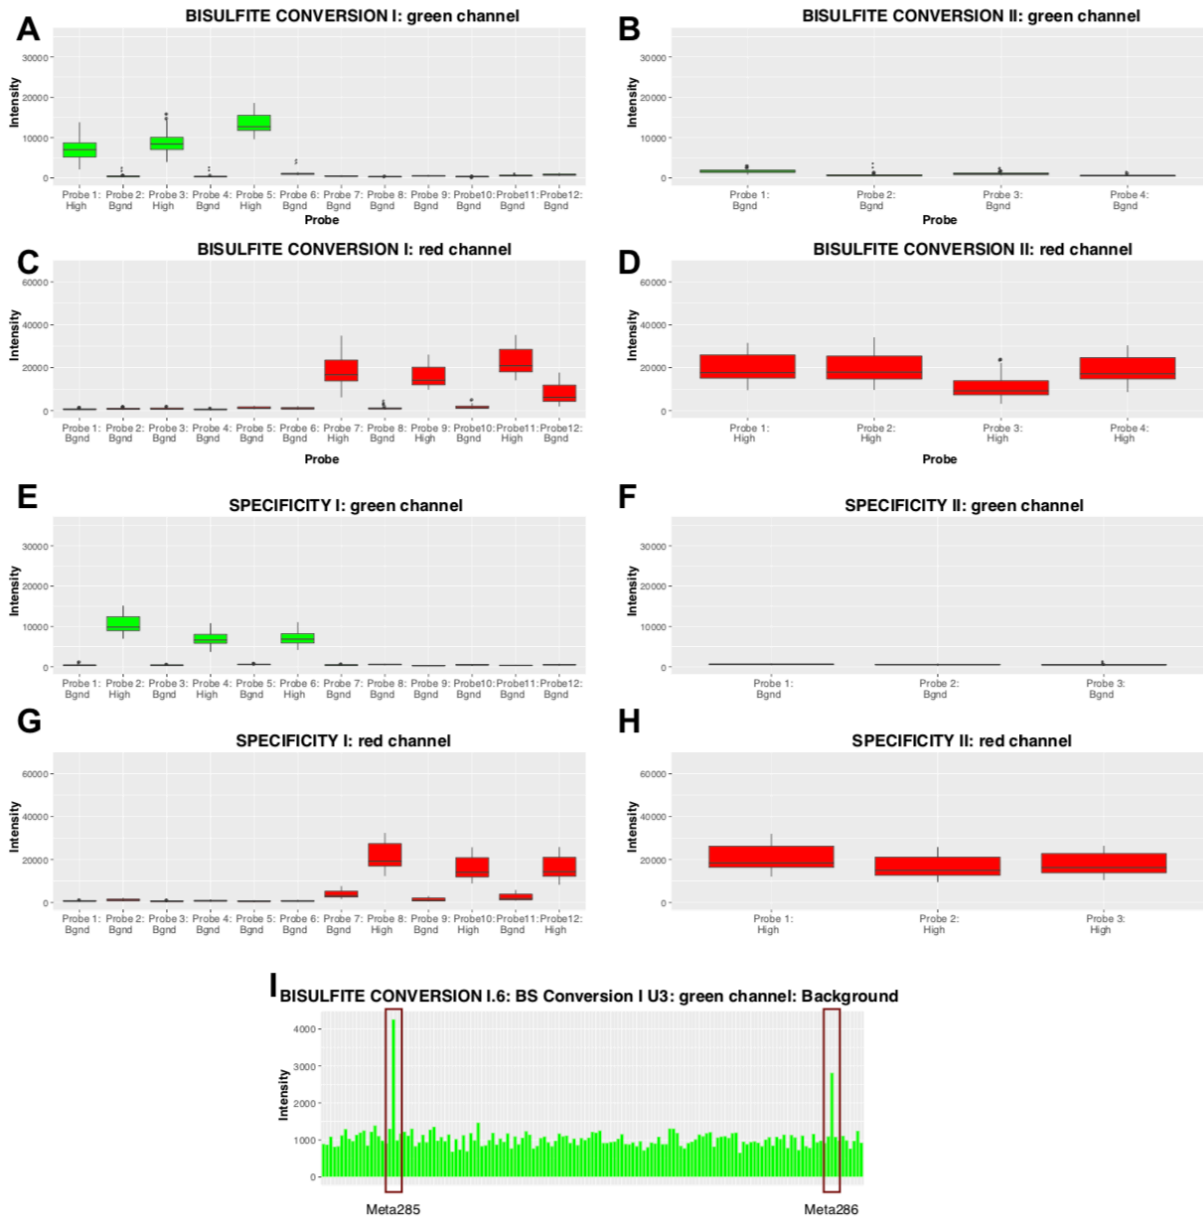

2  
 3 **Supplementary Methods Figure 1 | RnBeads quality control EWOG-MDS.** Quality  
 4 control box plots showing the intensities for bisulfite conversion (A-D) and specificity  
 5 (E-H) control probes on the 450k array for EWOG-MDS patients. Outlier intensities  
 6 were detected based on inspection of intensity bar plots for each control probe (I).

7

## 8 Supplementary Methods Figure 2

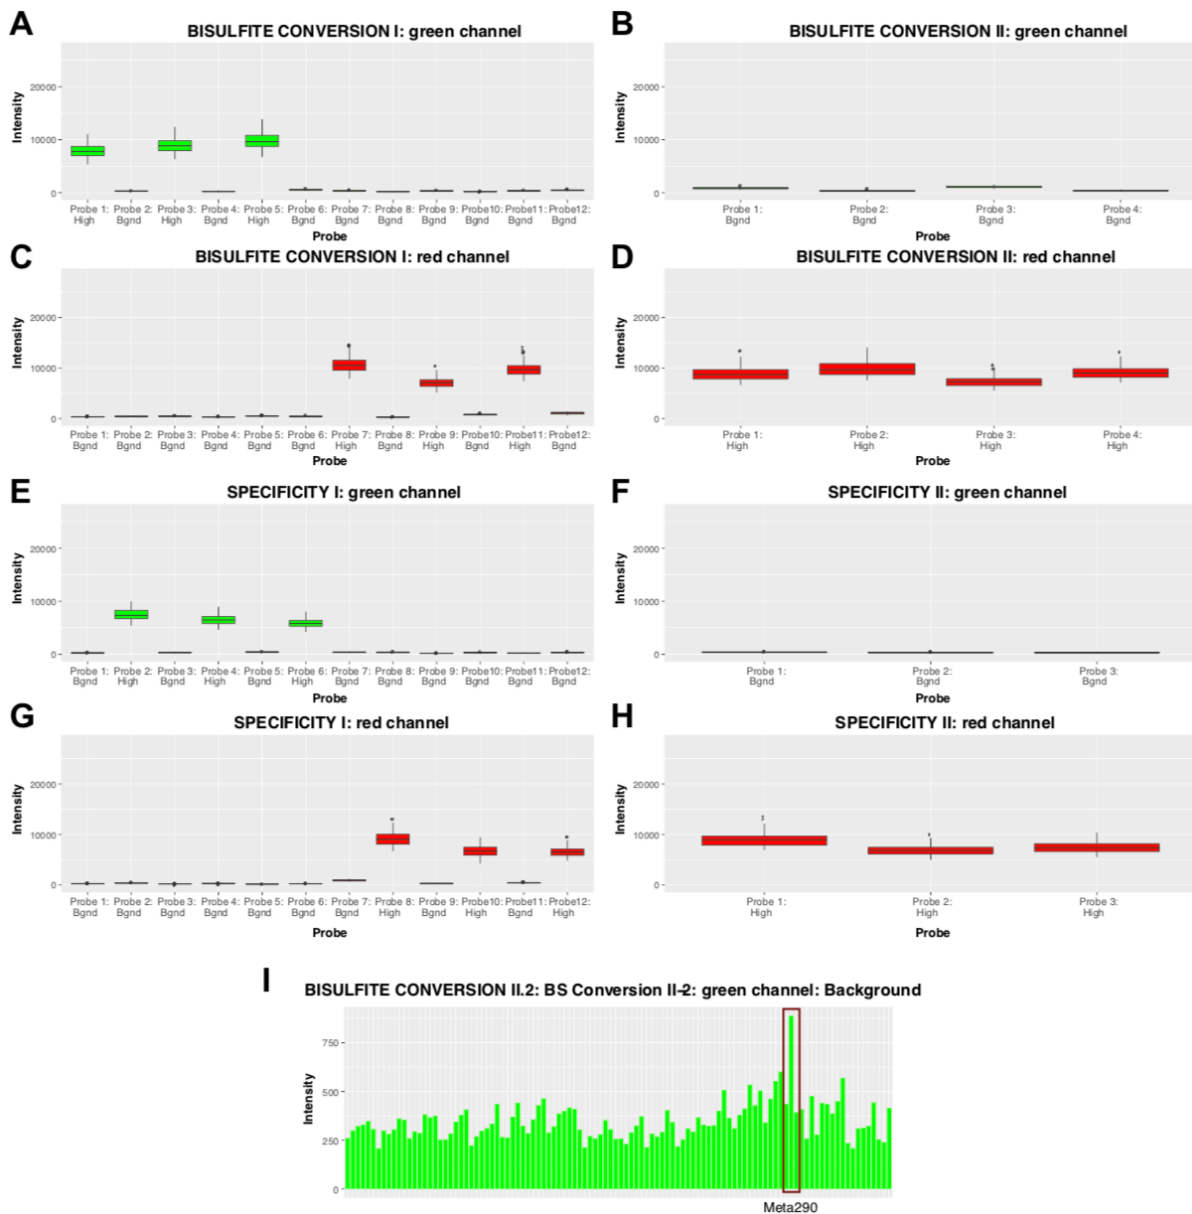

9  
10  
11  
12  
13  
14  
15

**Supplementary Methods Figure 2 | RnBeads quality control Japan.** Quality control box plots showing the intensities for bisulfite conversion (A-D) and specificity (E-H) control probes on the 450k array for Japanese patients. Outlier intensities were detected based on inspection of intensity bar plots for each control probe (I).

16 **Supplementary Methods Figure 3**

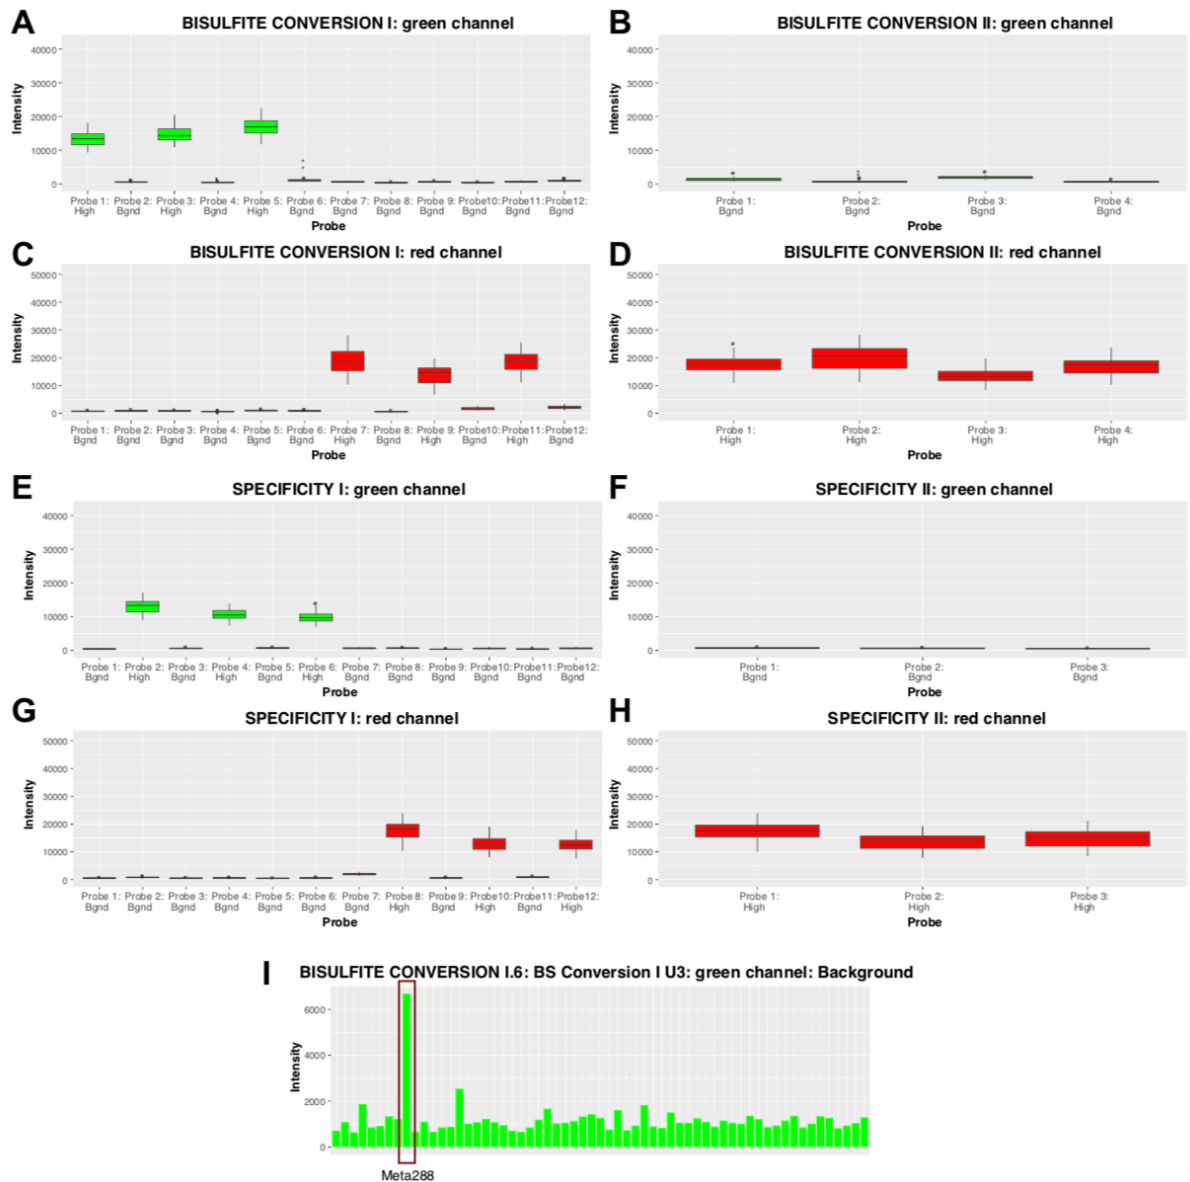

17

18 **Supplementary Methods Figure 3 | RnBeads quality control USA.** Quality control  
 19 box plots showing the intensities for bisulfite conversion (A-D) and specificity (E-H)  
 20 control probes on the 450k array for US patients. Outlier intensities were detected  
 21 based on inspection of intensity bar plots for each control probe (I).

22

23 **Supplementary Methods Table 1**

24 **Supplementary Methods Table 1 | Genes included in targeted sequencing panel.**

25 Gene name, location and ENSEMBL-ID are shown for all genes included in the  
 26 targeted sequencing panel. (ccds = consensus coding sequence)

| <b>GENE</b>   | <b>TYPE</b> | <b>EXONS</b> | <b>ENSEMBL</b>    |
|---------------|-------------|--------------|-------------------|
| <b>ASXL1</b>  | hotspot     | 12           | ENST00000375687   |
| <b>BRAF</b>   | hotspot     | 15           | ENST00000646891.1 |
| <b>CBL</b>    | hotspot     | 7,8,9        | ENST00000264033   |
| <b>DNMT3A</b> | full ccds   | all          | ENST00000264709   |
| <b>ETV6</b>   | full ccds   | all          | ENST00000396373.4 |
| <b>EZH2</b>   | full ccds   | all          | ENST00000320356   |
| <b>GATA2</b>  | full ccds   | all          | ENST00000341105   |
| <b>JAK3</b>   | full ccds   | all          | ENST00000458235   |
| <b>KRAS</b>   | hotspot     | 2,3          | ENST00000256078   |
| <b>MAP2K1</b> | hotspot     | 2,3,5,6      | ENST00000307102   |
| <b>NF1</b>    | full ccds   | all          | ENST00000358273   |
| <b>NRAS</b>   | hotspot     | 2,3          | ENST00000369535   |
| <b>PTPN11</b> | hotspot     | 3,4,13       | ENST00000351677   |
| <b>RAC2</b>   | full ccds   | all          | ENST00000249071   |
| <b>RAF1</b>   | hotspot     | 7            | ENST00000251849.8 |
| <b>RIT1</b>   | full ccds   | all          | ENST00000368323.7 |
| <b>RRAS</b>   | full ccds   | all          | ENST00000246792   |
| <b>RRAS2</b>  | hotspot     | 4            | ENST00000545643   |
| <b>RUNX1</b>  | full ccds   | all          | ENST00000300305   |
| <b>SAMD9</b>  | full ccds   | all          | ENST00000379958   |
| <b>SAMD9L</b> | full ccds   | all          | ENST00000318238   |
| <b>SETBP1</b> | hotspot     | 4            | ENST00000282030   |
| <b>SH2B3</b>  | full ccds   | all          | ENST00000341259   |
| <b>SOS1</b>   | full ccds   | all          | ENST00000341259   |
| <b>ZRSR2</b>  | full ccds   | all          | ENST00000307771   |

27

28

29
