# Supplementary material
Source: PubMed Central journal article supplement (PMC7785676)

# Supplementary Figure 6

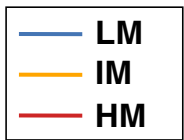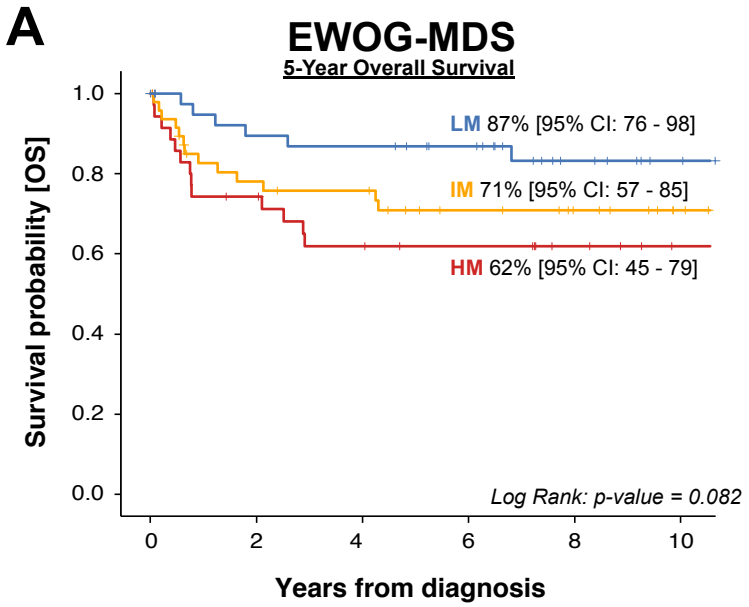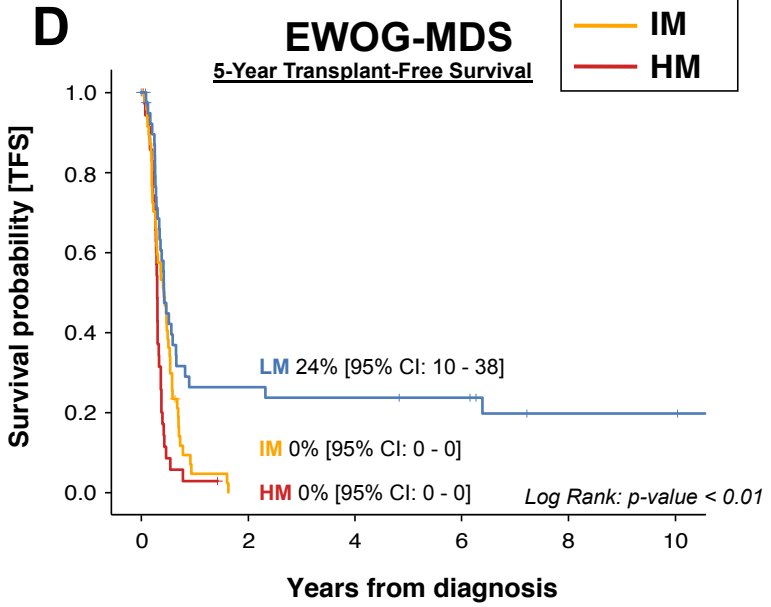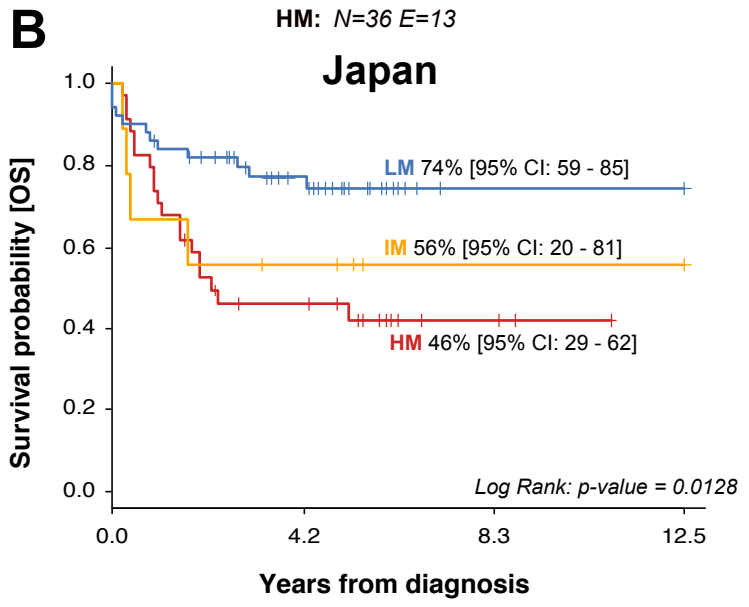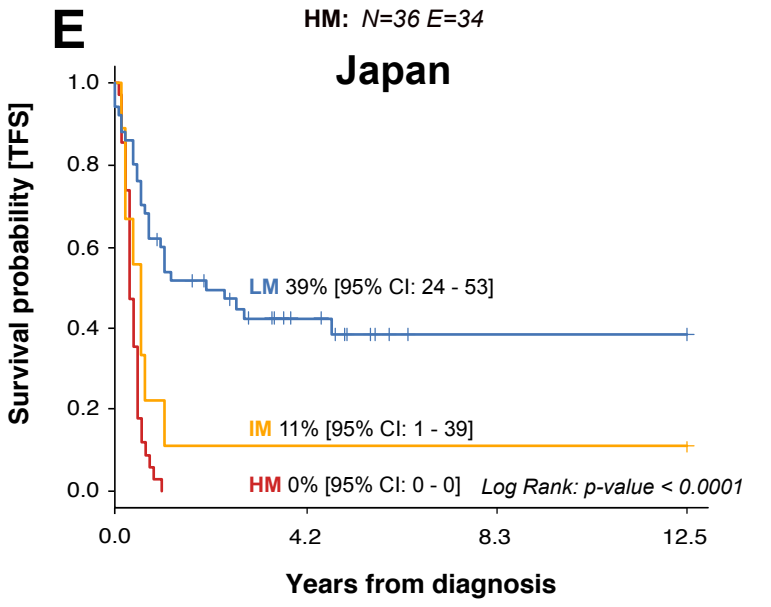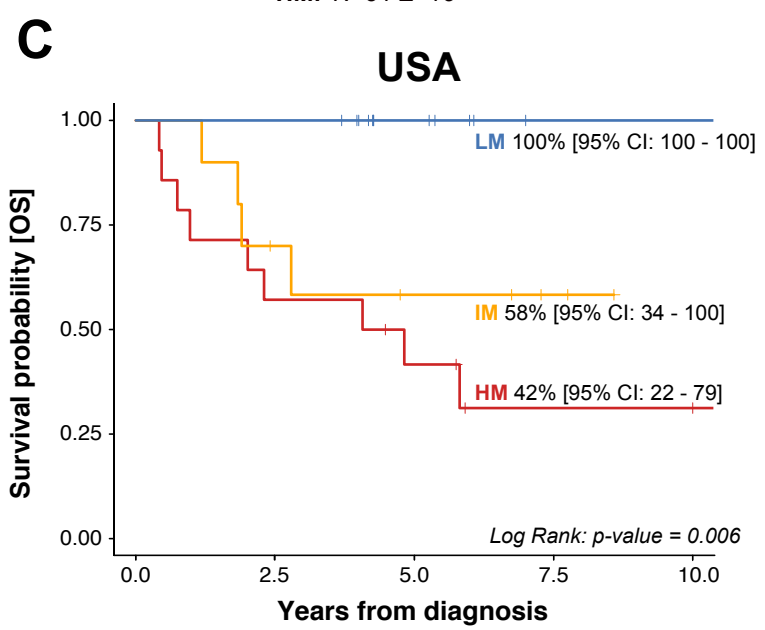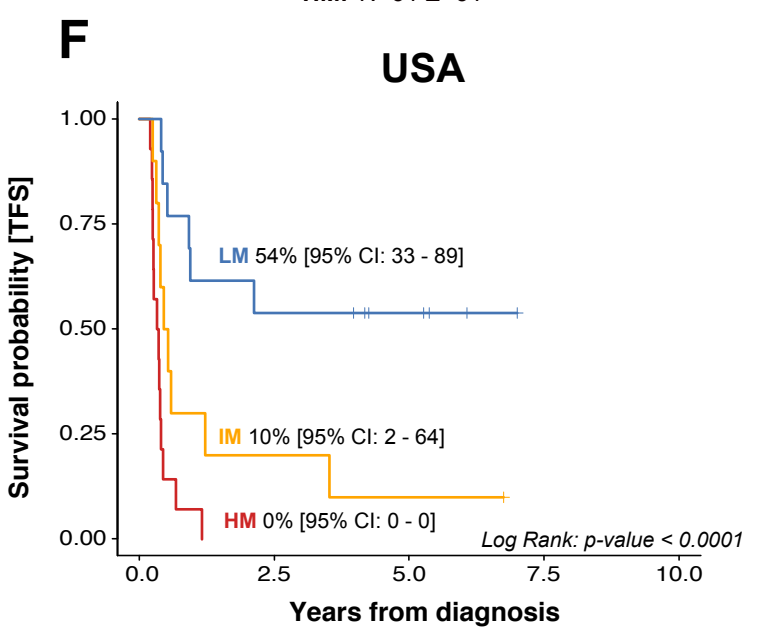

Supplement: NIHMS1642067-supplement-10.pdf [file NIHMS1642067-supplement-10.pdf]

# Supplementary Figure 7

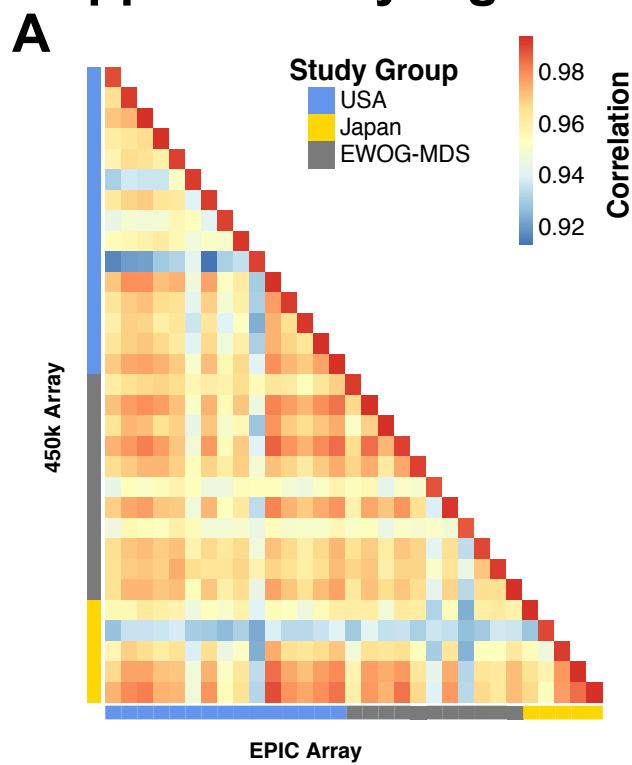

**B**

**Model Prediction**

|    | LM | IM | HM |
|----|----|----|----|
| LM | 13 | 0  | 0  |
| IM | 1  | 6  | 0  |
| HM | 0  | 0  | 11 |

**Consensus Cluster**

Accuracy: 96.77 %

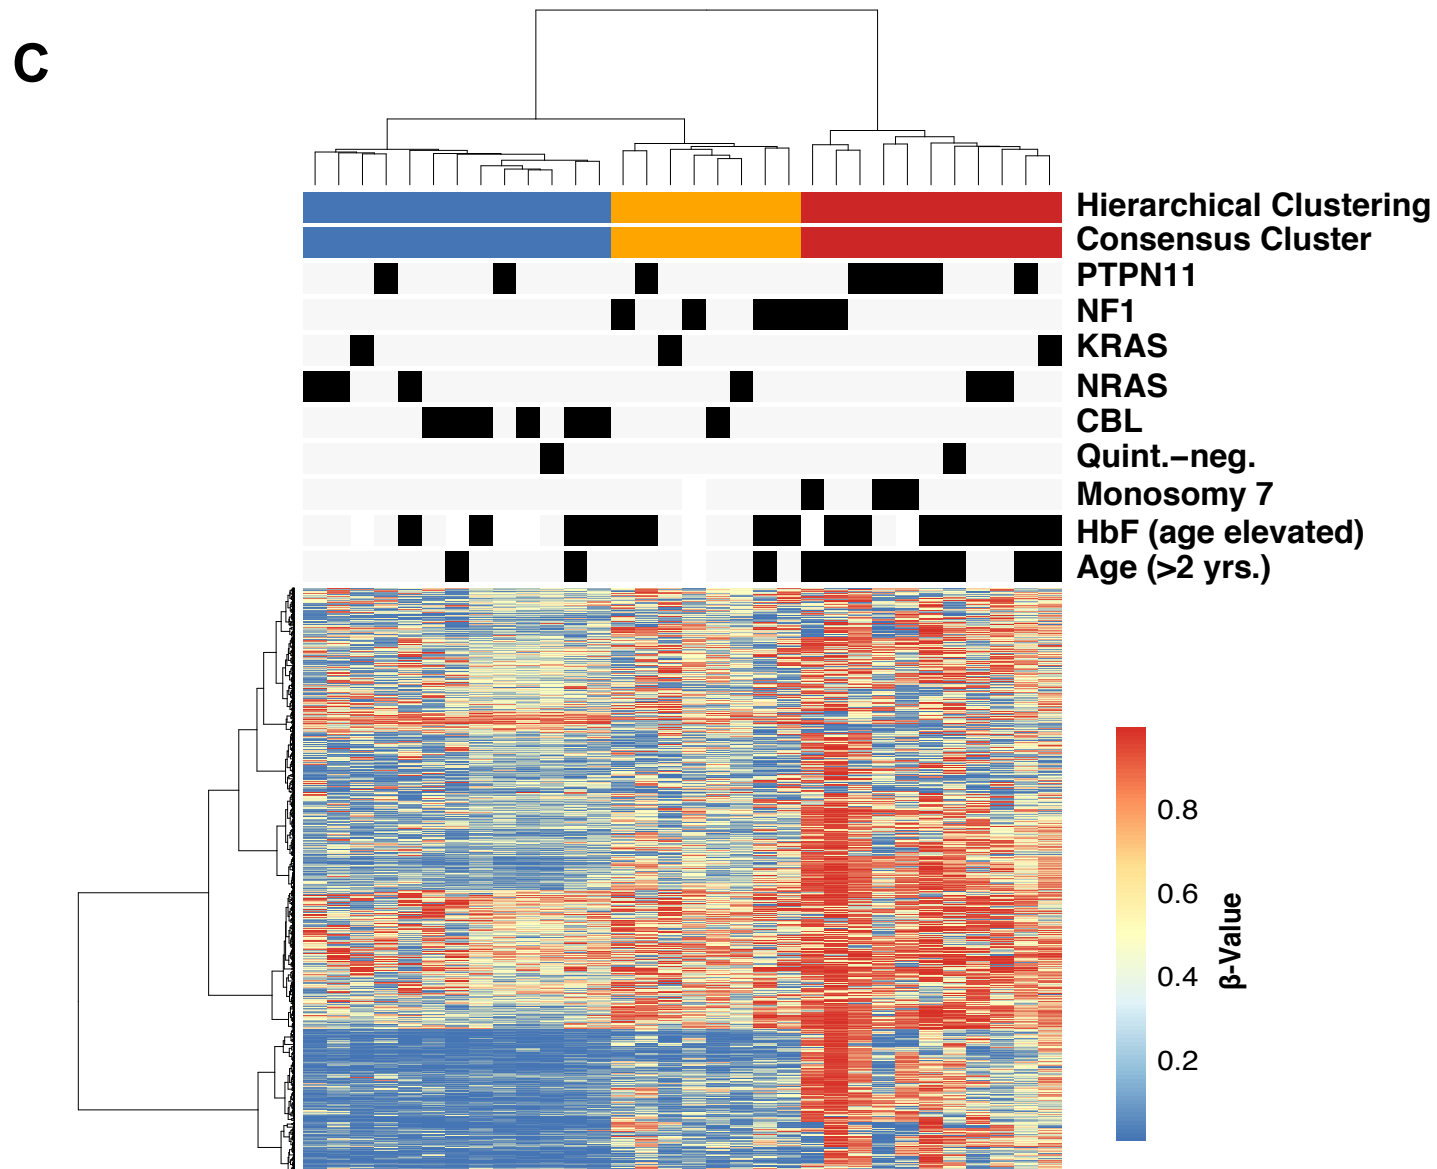

Supplement: NIHMS1642067-supplement-11.pdf [file NIHMS1642067-supplement-11.pdf]

# Supplementary Figure 1

**A**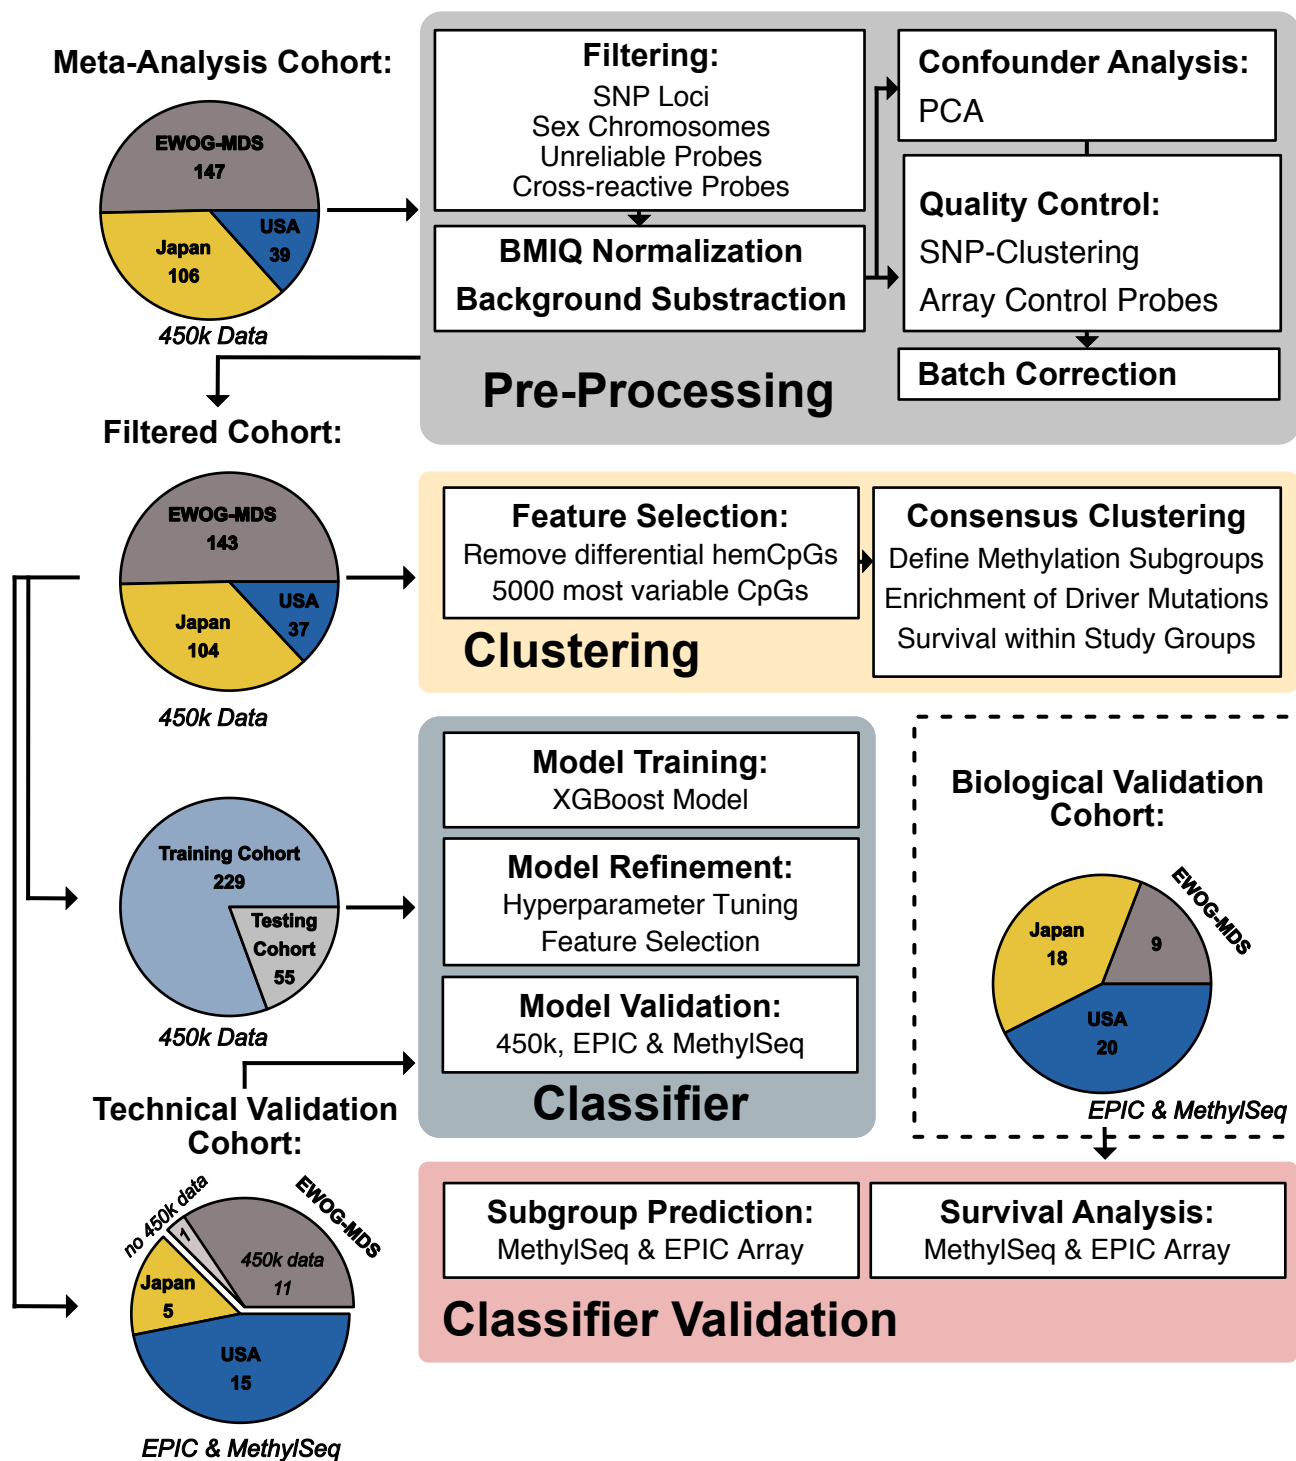**B**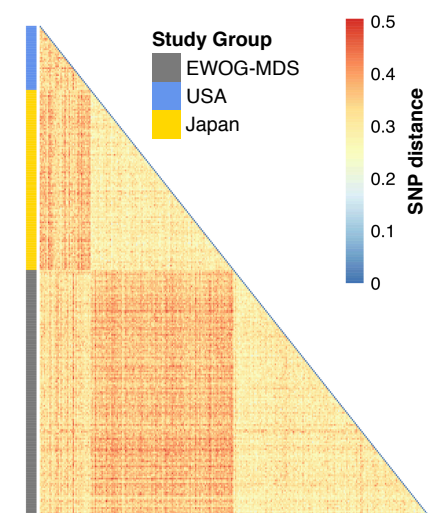**C**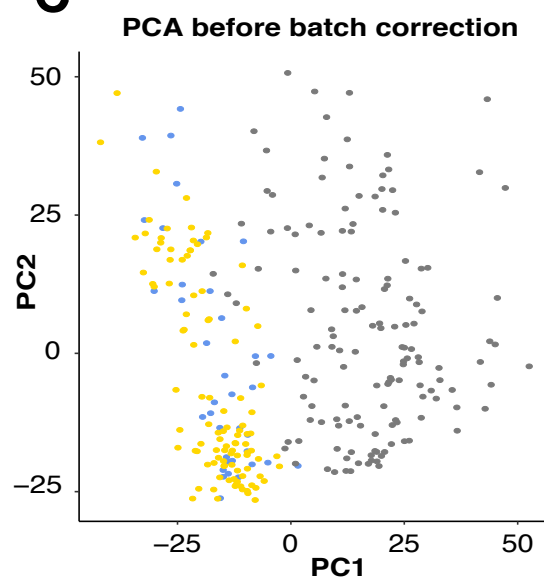**D**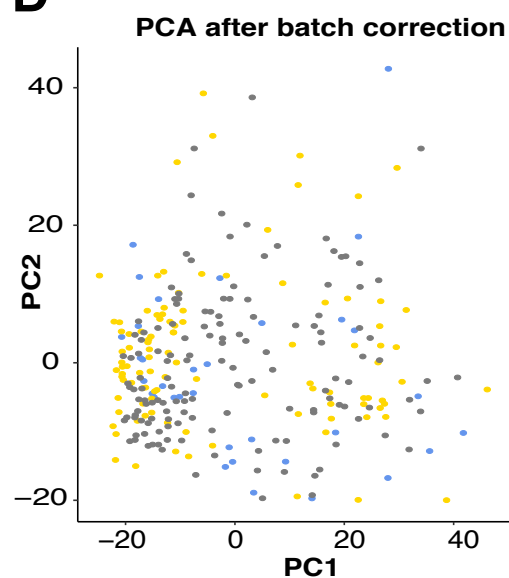

Supplement: NIHMS1642067-supplement-5.pdf [file NIHMS1642067-supplement-5.pdf]

# Supplementary Figure 2

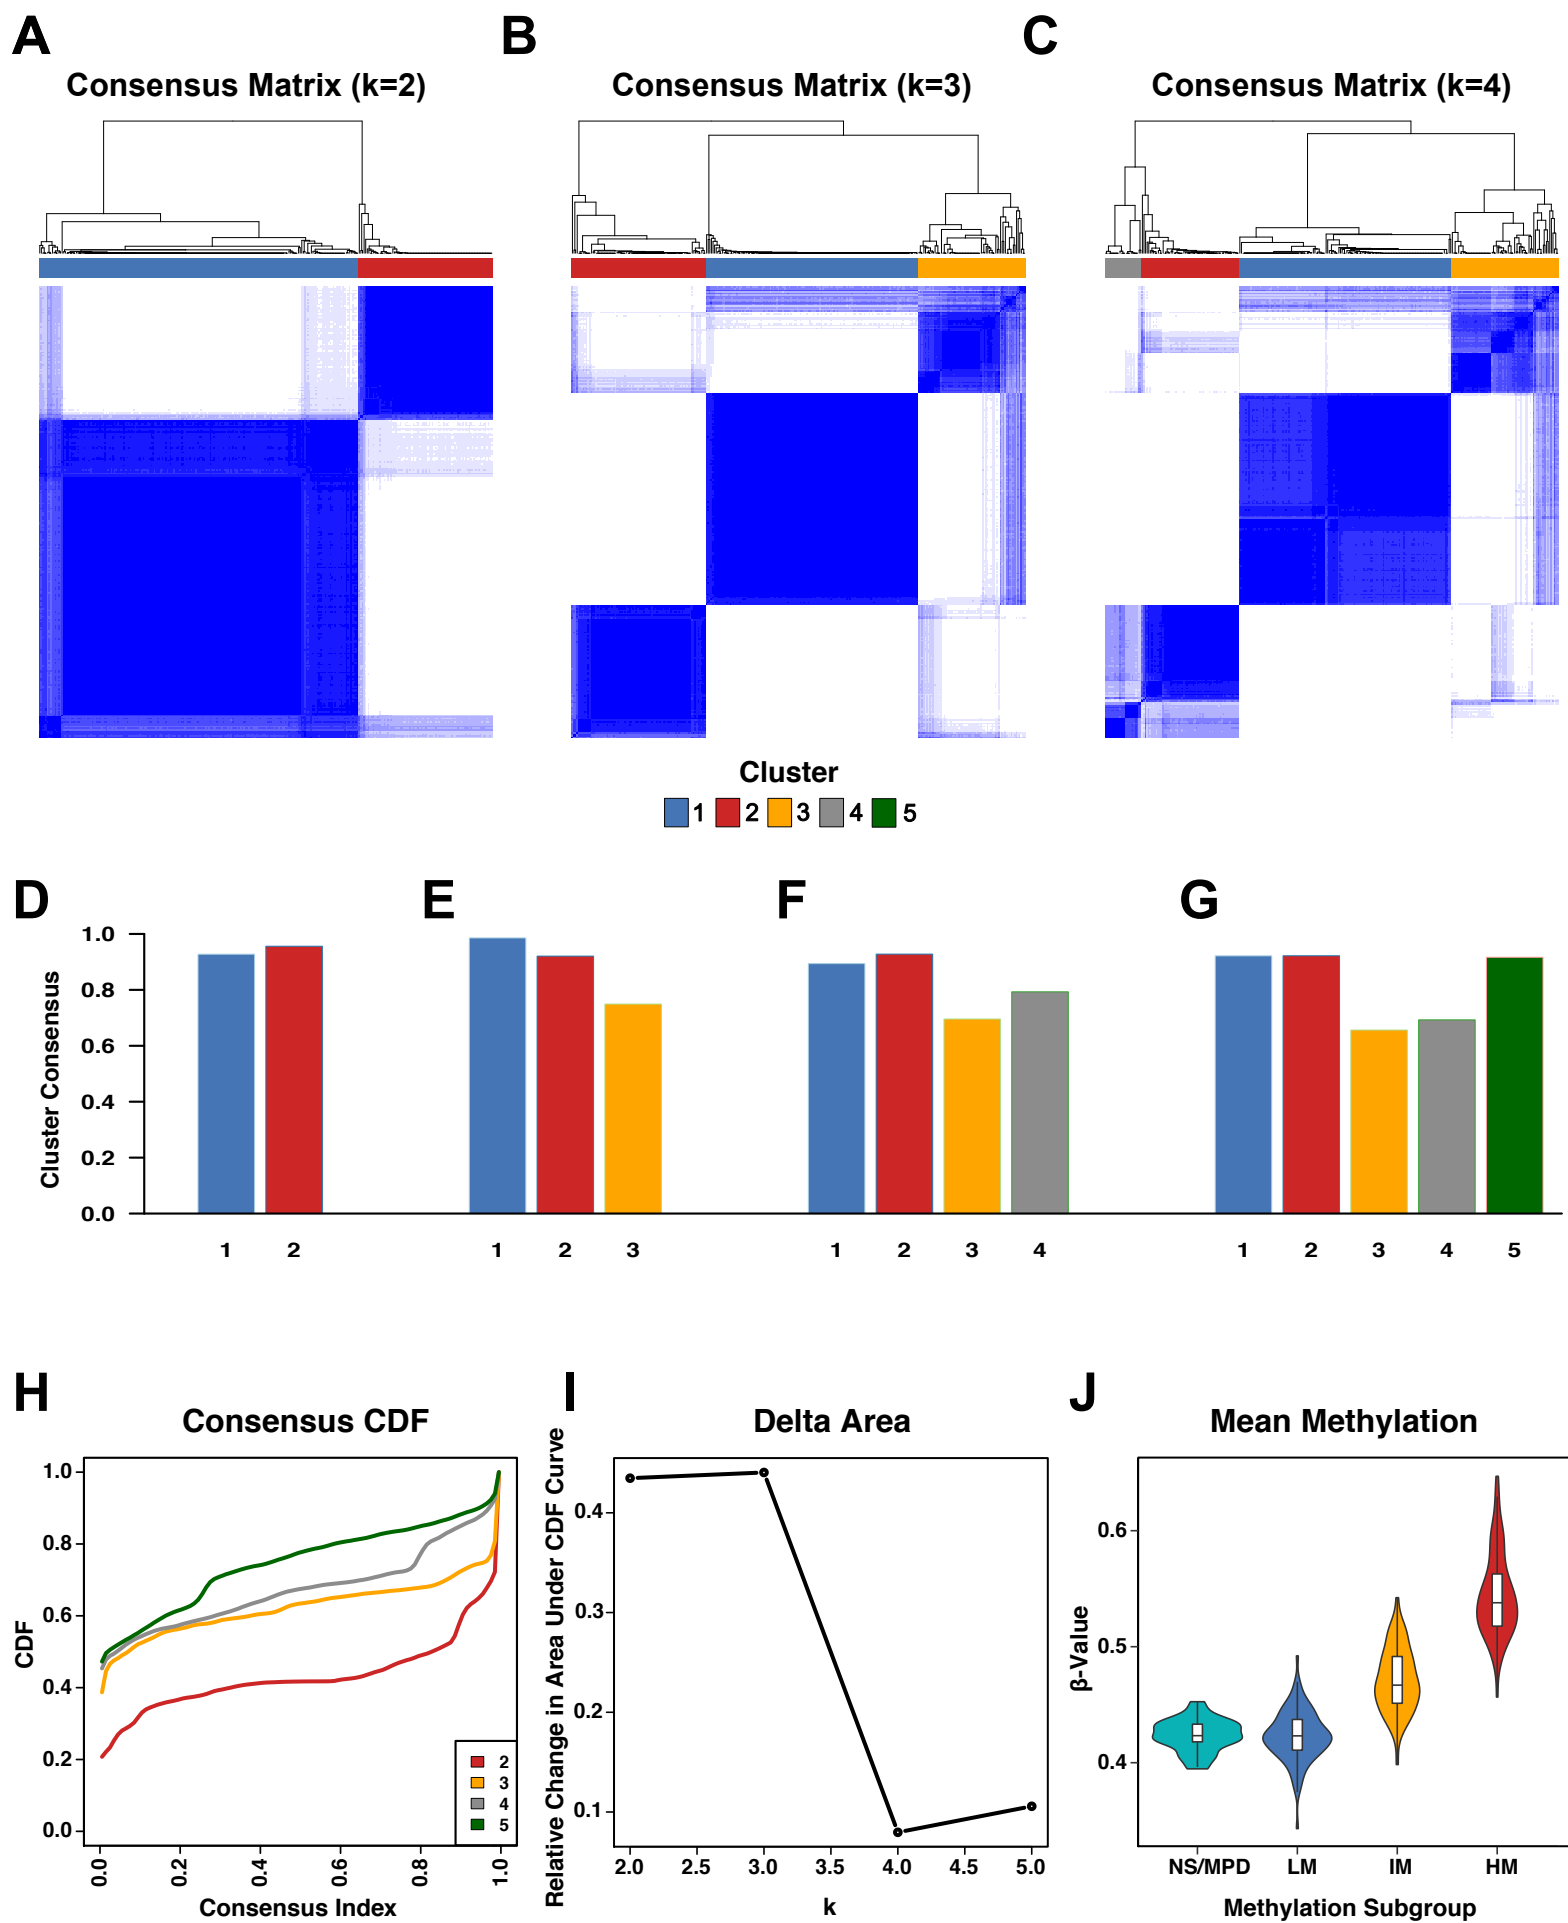

Supplement: NIHMS1642067-supplement-6.pdf [file NIHMS1642067-supplement-6.pdf]

# Supplementary Figure 3

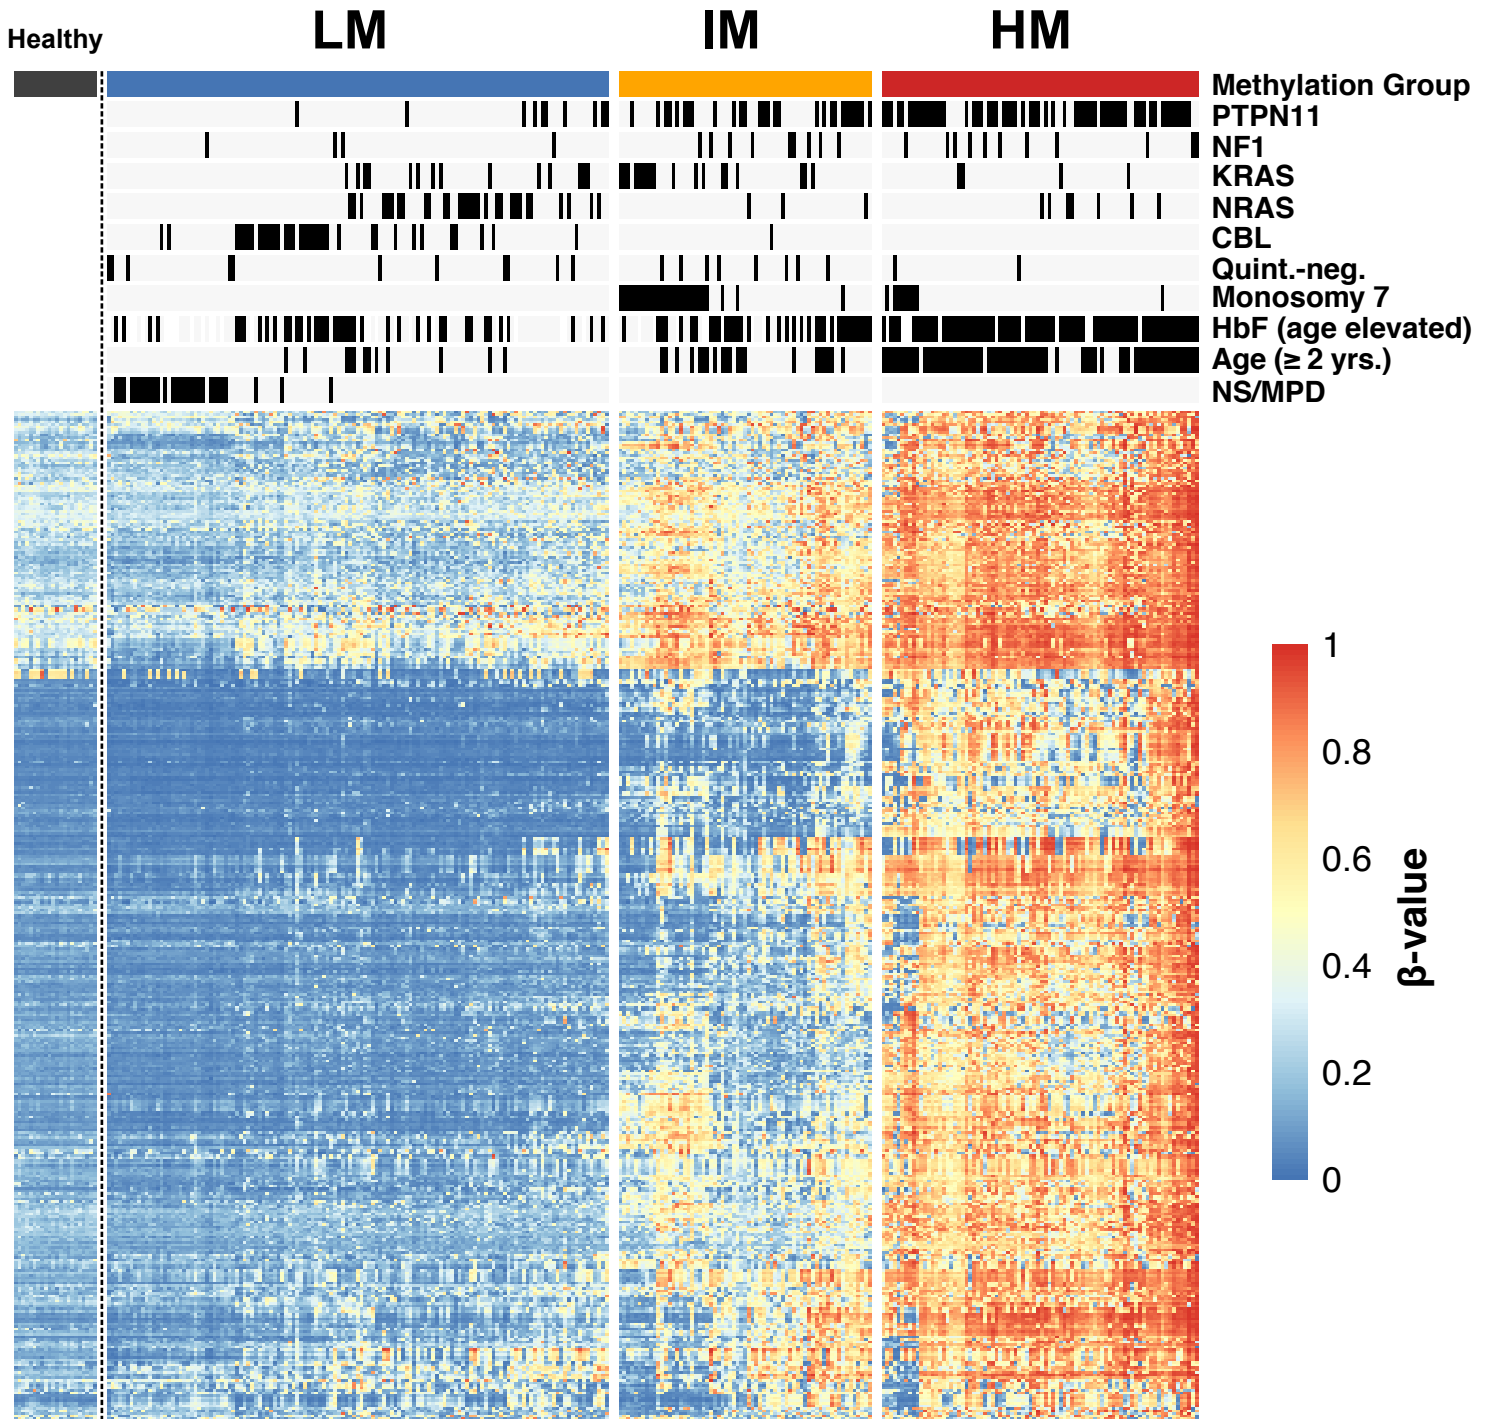

Supplement: NIHMS1642067-supplement-7.pdf [file NIHMS1642067-supplement-7.pdf]

# Supplementary Figure 4

## A

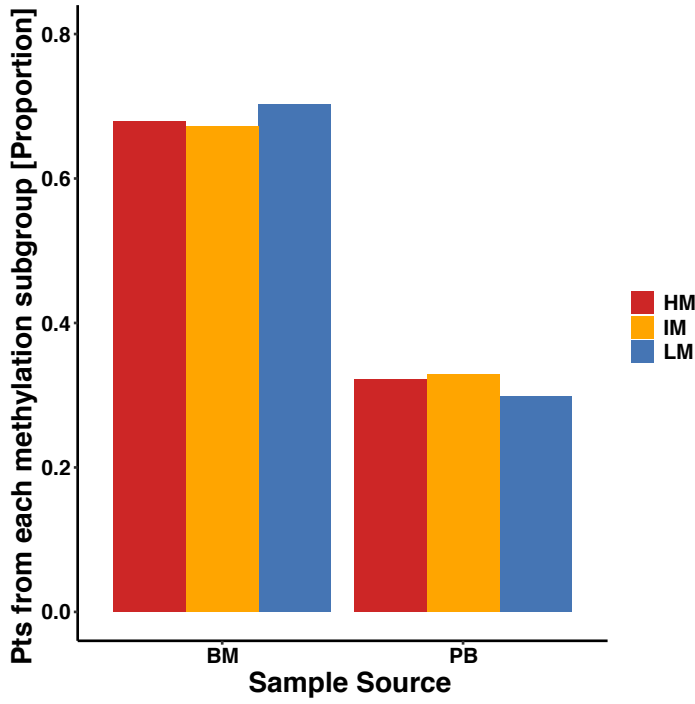

## B

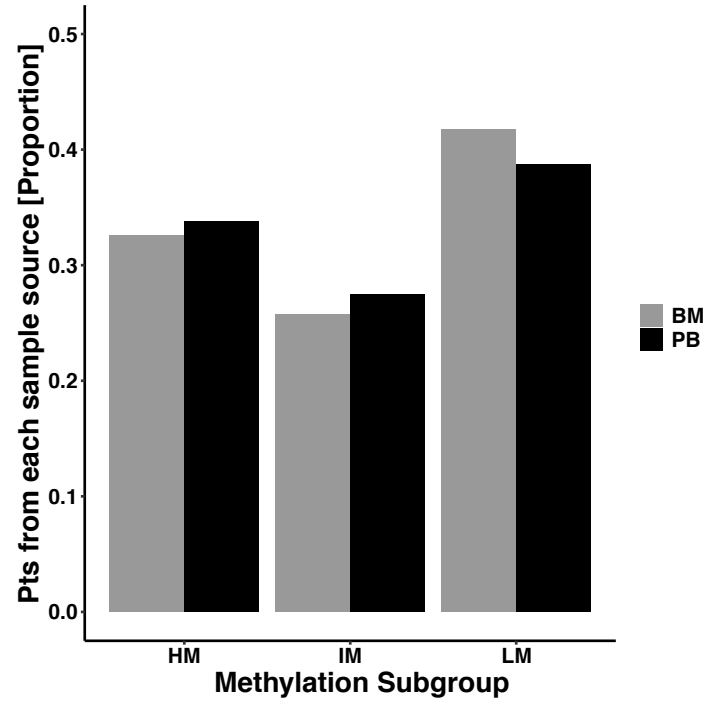

Supplement: NIHMS1642067-supplement-8.pdf [file NIHMS1642067-supplement-8.pdf]

# Supplementary Figure 5

## A

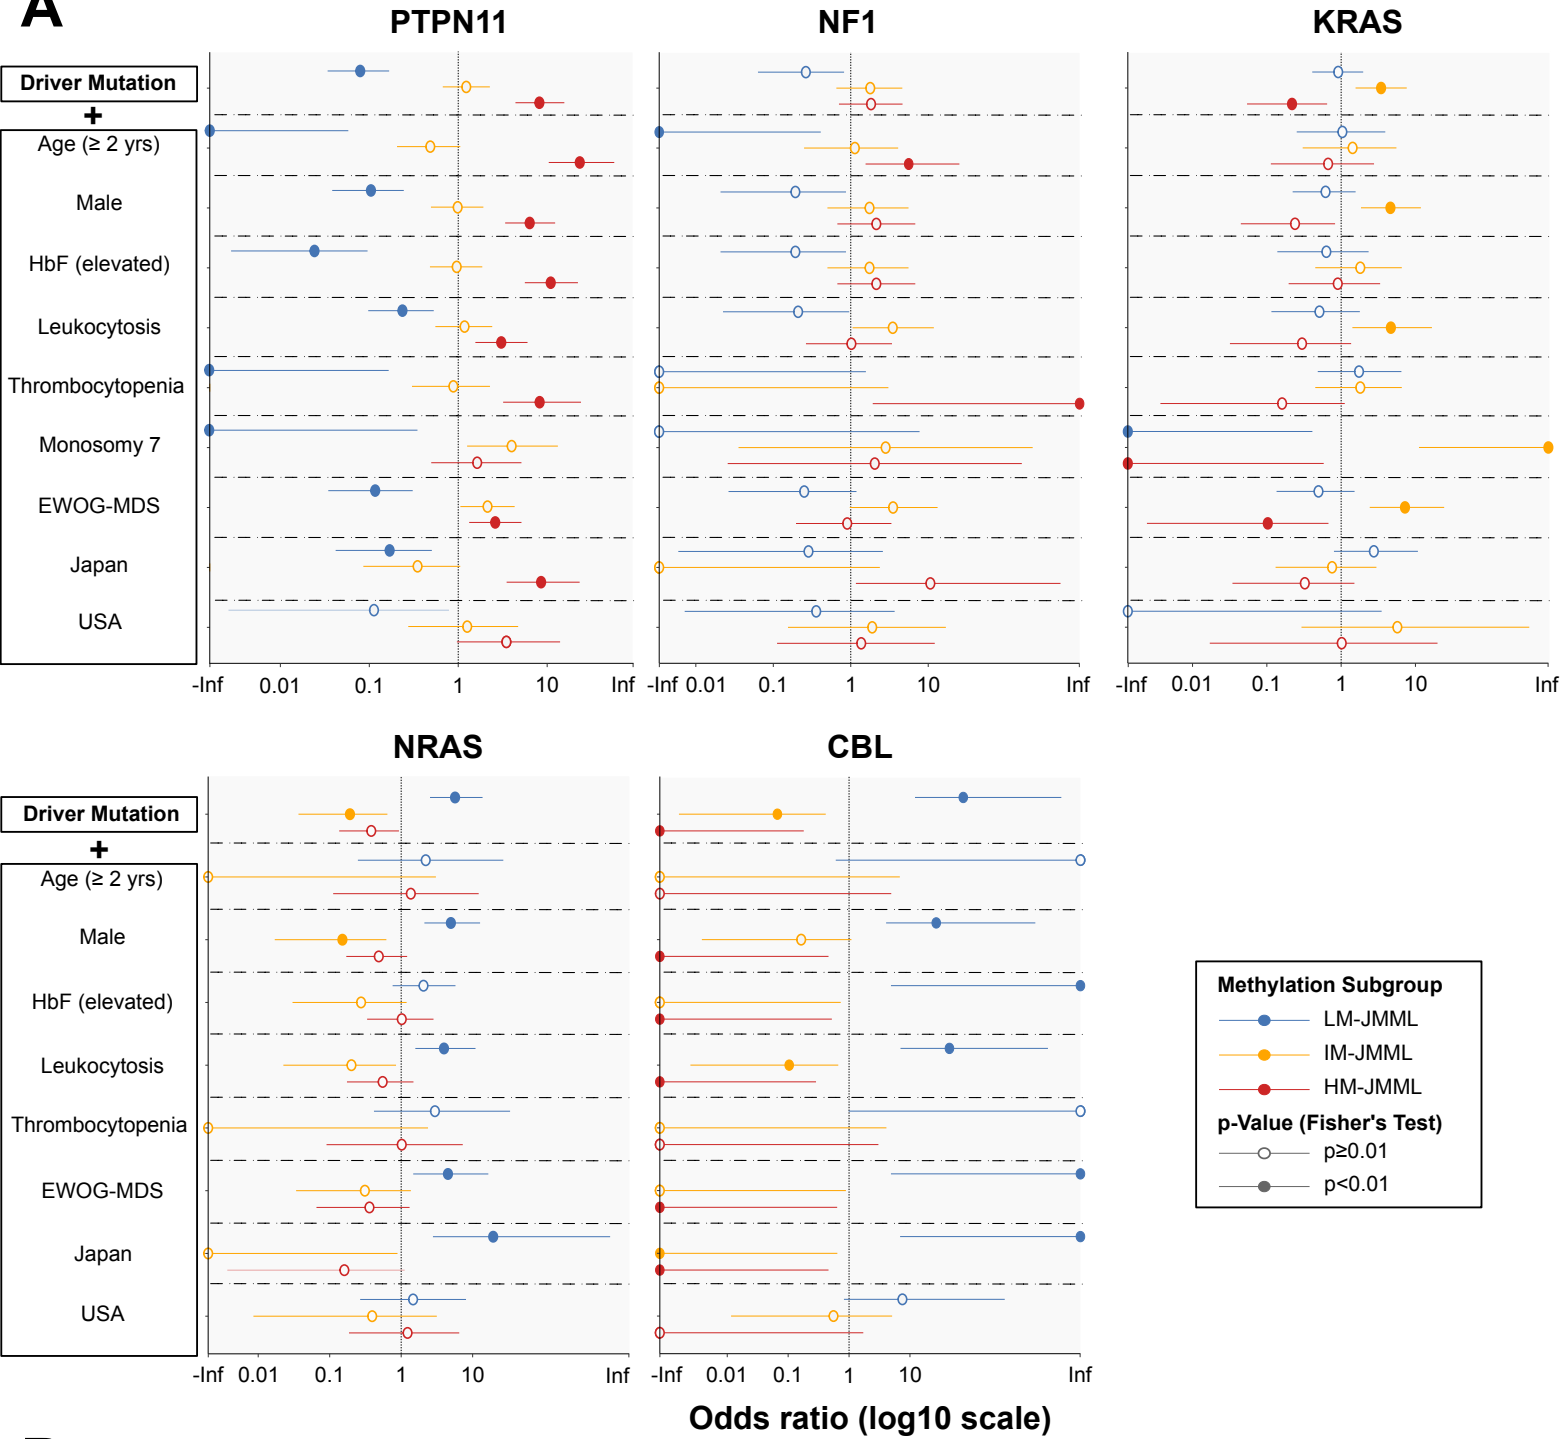

## B

### Pts with KRAS Mutations

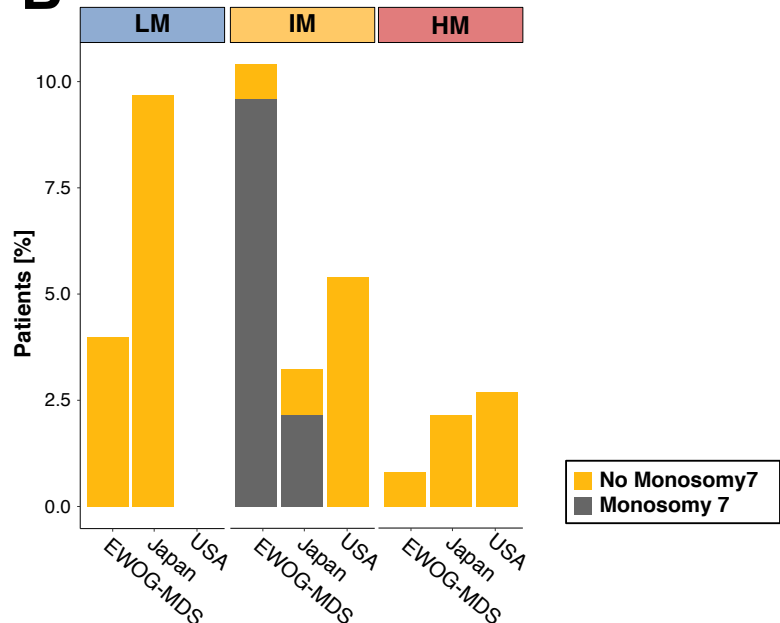

Supplement: NIHMS1642067-supplement-9.pdf [file NIHMS1642067-supplement-9.pdf]
